# Supplementary material for: Experimental and Theoretical Estimations of Atrazine’s Adsorption in Mangosteen-Peel-Derived Nanoporous Carbons
Source: MDPI journal article supplement (doi:10.3390/molecules28135268), 2023-07-07
Supplement: s1 [file s1]

## Supplementary Material

# Experimental and Theoretical Estimations of Atrazine's Adsorption in Mangosteen-Peel-Derived Nanoporous Carbons

Juan Matos <sup>1,\*</sup>, Claudia P. Amézquita-Marroquín <sup>2,3</sup>, Johan D. Lozano <sup>3</sup>, Jhon Zapata-Rivera <sup>3</sup>, Liliana Giraldo <sup>4</sup>, Po S. Poon <sup>5</sup> and Juan C. Moreno-Piraján <sup>3,\*</sup>

<sup>1</sup> Instituto de Ciencias Aplicadas, Facultad de Ingeniería, Universidad Autónoma de Chile, Santiago 8900000, Chile

<sup>2</sup> Escuela de Ingeniería de los Recursos Naturales y del Ambiente, Facultad de Ingeniería, Universidad del Valle, Calle 13 100-00, Cali 760035, Colombia; claudia.patricia.amezquita@gmail.com

<sup>3</sup> Departamento de Química, Facultad de Ciencias, Universidad de los Andes, Carrera Primera 18A-12, Bogotá 111711, Colombia; jd.lozanoc@uniandes.edu.co (J.D.L.); j.zapatar@uniandes.edu.co (J.Z.-R.)

<sup>4</sup> Departamento de Química, Facultad de Ciencias, Universidad Nacional de Colombia, Carrera 45, Bogotá 111231, Colombia; lgiraldogu@unal.edu.co

<sup>5</sup> Unidad de Desarrollo Tecnológico (UDT), Universidad de Concepción, Barrio Universitario s/n, Concepción 4191996, Chile; ppoonngwork@gmail.com

\* Correspondence: juan.matos@uautonoma.cl (J.M.); jumoreno@uniandes.edu.co (J.C.M.-P.)

**Table S1.** Kinetics model used for the analysis of ATZ adsorption.

| Kinetic model           | Equation                                         | Reference |
|-------------------------|--------------------------------------------------|-----------|
| Pseudo-first-order      | $\log(q_{eq} - q_t) = \log(q_t) - (k_1/2.303) t$ | [53,56]   |
| Pseudo-second-order     | $(1/q_{eq} - q_t) = (1/q_{eq}) + k_2 t$          | [53,57]   |
| Intraparticle diffusion | $q_t = C + k_p t^{1/2}$                          | [53-55]   |

The pseudo-first-order model showed in Eq. (1) where  $k_1$  is the pseudo-first-order rate constant ( $\text{min}^{-1}$ ) for the adsorption,  $q_t$  is the amount of MB adsorbed (in  $\mu\text{mol}$ ), at time  $t$  (min) and  $q_{eq}$  is the amount adsorbed at equilibrium (in  $\mu\text{mol}$ ).

$$dq_t/dt = k_1(q_{eq} - q_t) \quad (1)$$

The integration of Eq. (1) at the initial conditions ( $q_{at} = 0$  at  $t = 0$ ) yields the Eq. (2):

$$\log(q_{eq} - q_t) = \log(q_{eq}) - (k_1/2.303).t \quad (2)$$

In addition, a pseudo-second-order equation may be expressed by Eq. (3):

$$dq_t/dt = k_2(q_{eq} - q_t)^2 \quad (3)$$

Where  $k_2$  is the pseudo-second-order rate constant ( $\mu\text{mol}^{-1}.\text{min}^{-1}$ ) for the adsorption.

Applying the initial conditions, Eq. (3) can be integrated to obtain:

$$(1/q_{eq} - q_t) = (1/q_{eq}) + k_2.t \quad (4)$$

The influence of the intraparticle diffusion phenomena upon the adsorption capacity of MB was verified keeping in mind that the fractional approach to equilibrium change is done according to a function of  $(Dt/r^2)^{1/2}$ , where  $r$  is the radius of adsorbent particle and  $D$  is the effective diffusivity of solute within the particle. Thus, the initial rate according to the intraparticle diffusion model (IPD) is obtained from the liner regression of the curve  $q_t = f(t^{1/2})$ , expressed by the Eq. (5) where  $k_p$  is the IPD rate constant expressed in  $\mu\text{mol min}^{-0.5}$ , and  $C$  is the IPD capacity constant ( $\mu\text{mol}$ ) attributed to the extension of the boundary layer thickness.

$$q_t = C + k_p.t^{1/2} \quad (5)$$

**Table S2.** Models for the adsorption's isotherms and mathematical expression involved in the different equilibrium adsorption isotherms.

| Model      | Equation                                                                                      | Reference |
|------------|-----------------------------------------------------------------------------------------------|-----------|
| Langmuir   | $q_{eq} = q_m.K_L.C_{eq}/(1 + K_L.C_{eq})$<br>$\theta = q_{eq}/q_m = \text{Surface coverage}$ | [62]      |
| Freundlich | $q_{eq} = K_F.C_{eq}^{1/n}$                                                                   | [63]      |

$q_{eq}$ : Amount of ATZ adsorbed at equilibrium ( $\mu\text{mol}$ );  $q_m$ : Maximum capacity for the ATZ adsorption in the monolayer ( $\mu\text{mol}$ ; also expressed in  $\text{mmol}\cdot\text{g}^{-1}$ );  $C_{eq}$ : Concentration in equilibrium ( $\mu\text{mol}\cdot\text{L}^{-1}$ );  $K_L$ : adsorption constant according to Langmuir model ( $\text{L}\cdot\mu\text{mol}^{-1}$ );  $K_F$ : adsorption constant according to Freundlich model (L);  $n$ : Freundlich's heterogeneity factor.

**Table S3.** Atrazine's selected properties.

| Property                                   | Property value                                                                           |
|--------------------------------------------|------------------------------------------------------------------------------------------|
| Molecular weight ( $\text{g mol}^{-1}$ )   | 215.68                                                                                   |
| Vapour pressure (Pa)                       | $3.8 \times 10^{-5}$ at $25^\circ\text{C}$<br>$4.0 \times 10^{-5}$ at $20^\circ\text{C}$ |
| Melting point ( $^\circ\text{C}$ )         | 175.8                                                                                    |
| Solubility in water ( $\text{mg L}^{-1}$ ) | 28 at $20^\circ\text{C}$<br>35 at $25^\circ\text{C}$                                     |
| Density ( $\text{g cm}^{-3}$ )             | 1.187 at $20^\circ\text{C}$                                                              |
| - Ln(pKa)                                  | 1.62 at $20^\circ\text{C}$ ,<br>1.70 at $21^\circ\text{C}$                               |
| Molecular size                             | Width: 0.96 nm<br>Depth: 0.84 nm<br>Cross sectional diameter: $0.544 \text{ nm}^2$       |

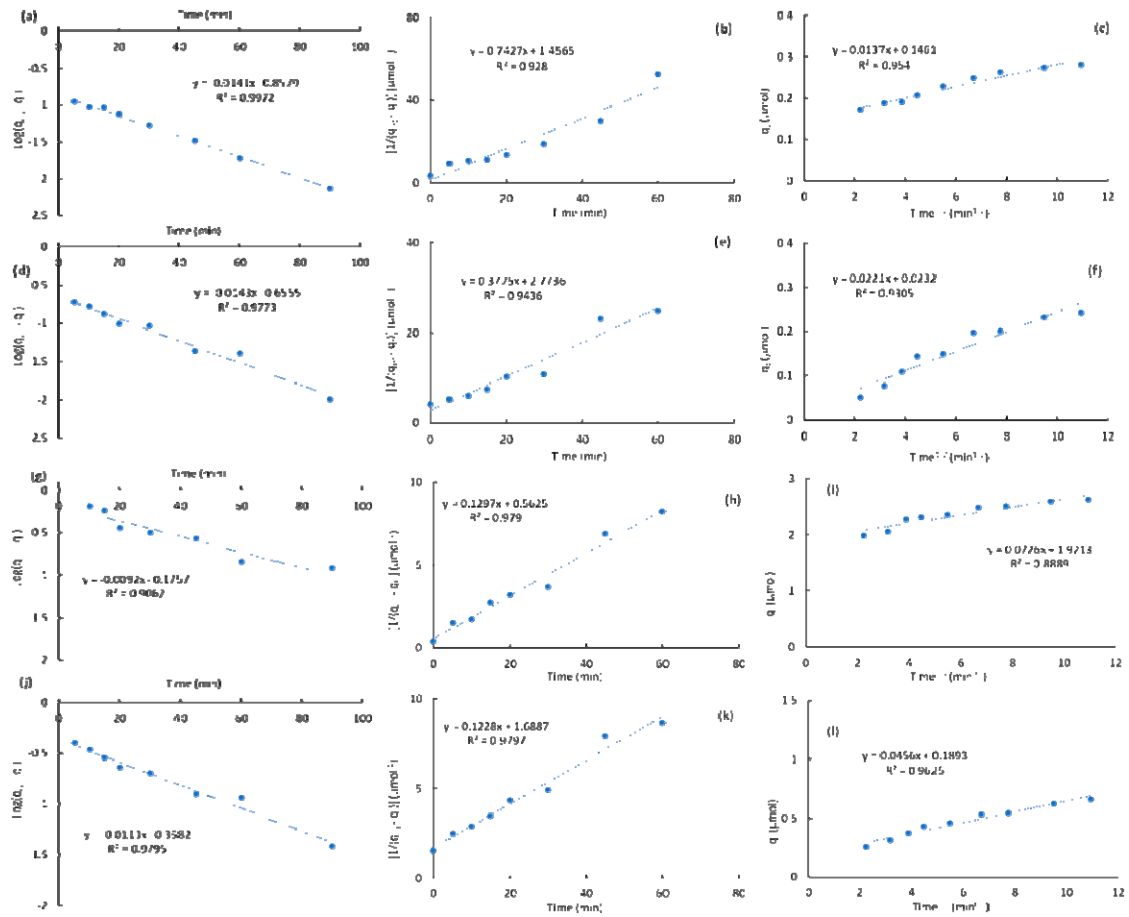

**Figure S1.** Kinetics treatments for ATZ adsorption on ACM (a,b,c,g,h,i) and MPB-CO<sub>2</sub> (d,e,f,j,k,l). 0.5 ppm: (a,b,c,d,e,f); 5.0 ppm: (g,h,i,j,k,l). Pseudo first-order: (a,d,g,j); Pseudo second-order: (b,e,h,k); Intraparticle diffusion model: (c,f,i,l).

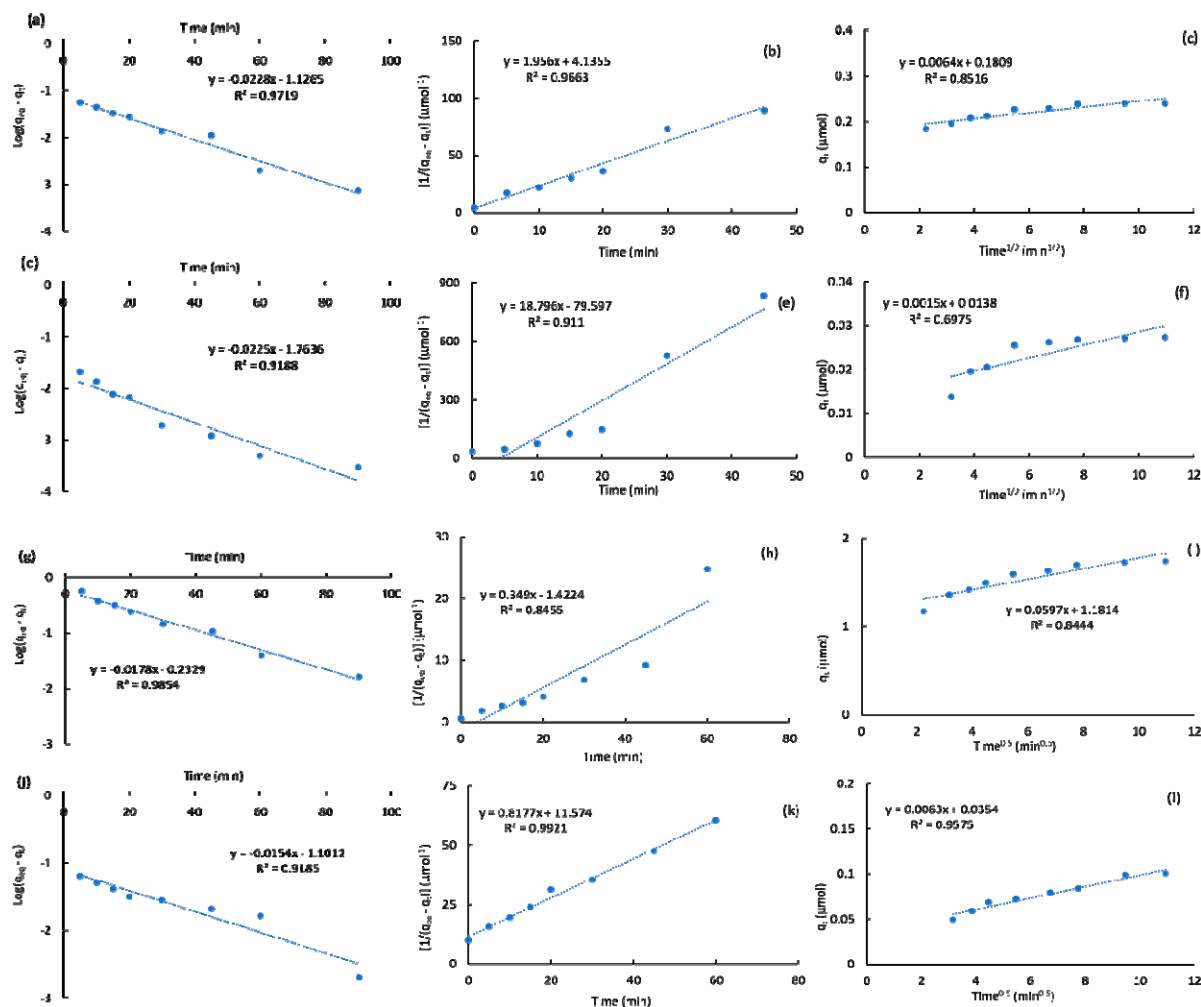

**Figure S2.** Kinetics treatments for ATZ adsorption on ACPC (a,b,c,g,h,i) and MPB-P50 (d,e,f,j,k,l). 0.5 ppm: (a,b,c,d,e,f); 5.0 ppm: (g,h,i,j,k,l). Pseudo first-order: (a,d,g,j); Pseudo second-order: (b,e,h,k); Intraparticle diffusion model: (c,f,i,l).

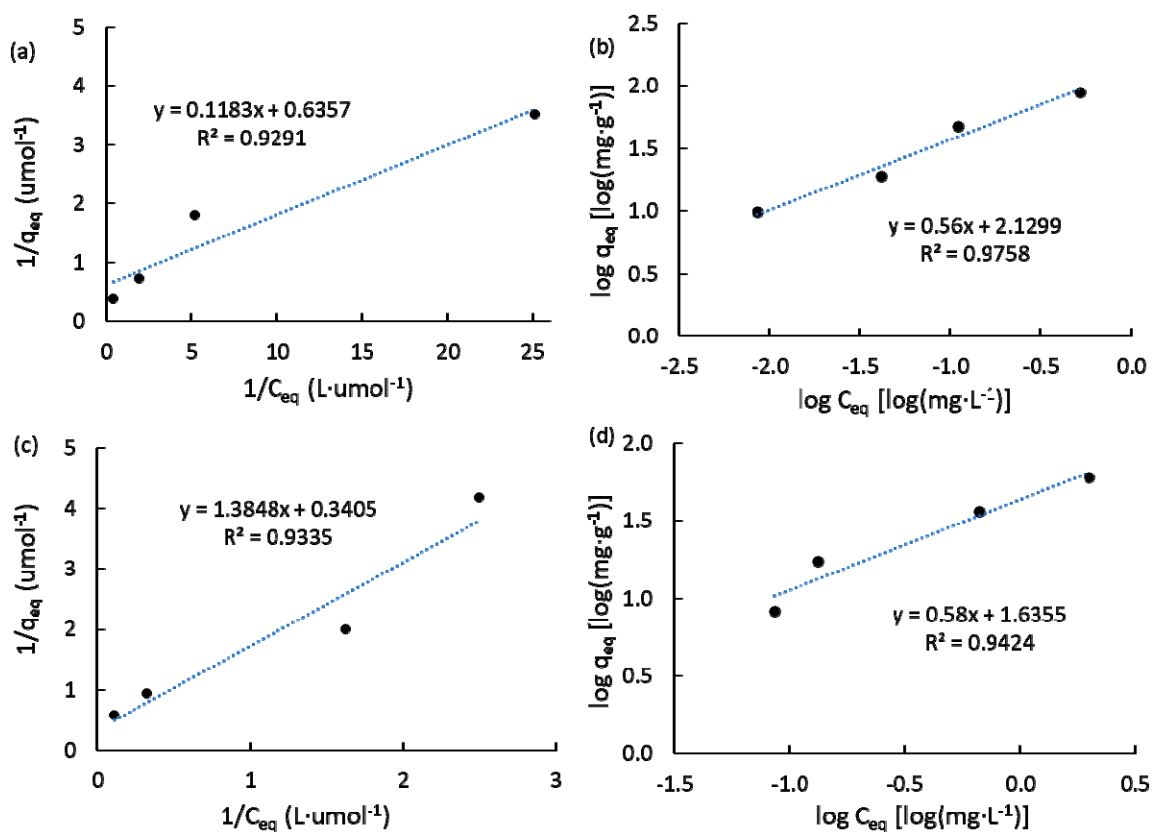

**Figure S3.** Linear regressions of Langmuir (a,c) and Freundlich (b,d) adsorption isotherms of atrazine. (a,b): ACM; (c,d): ACPC.

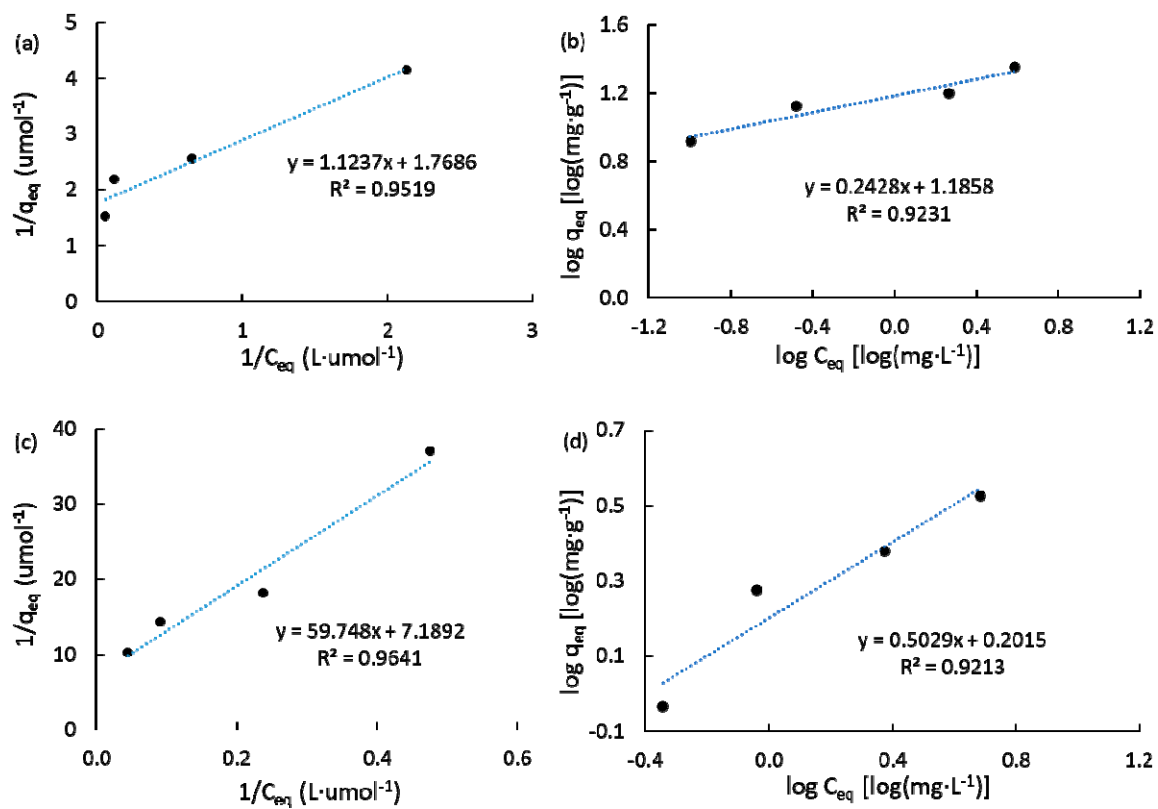

**Figure S4.** Linear regressions of Langmuir (a,c) and Freundlich (b,d) adsorption isotherms of atrazine. (a,b): MPB-CO<sub>2</sub>; (c,d): MPB-P50.

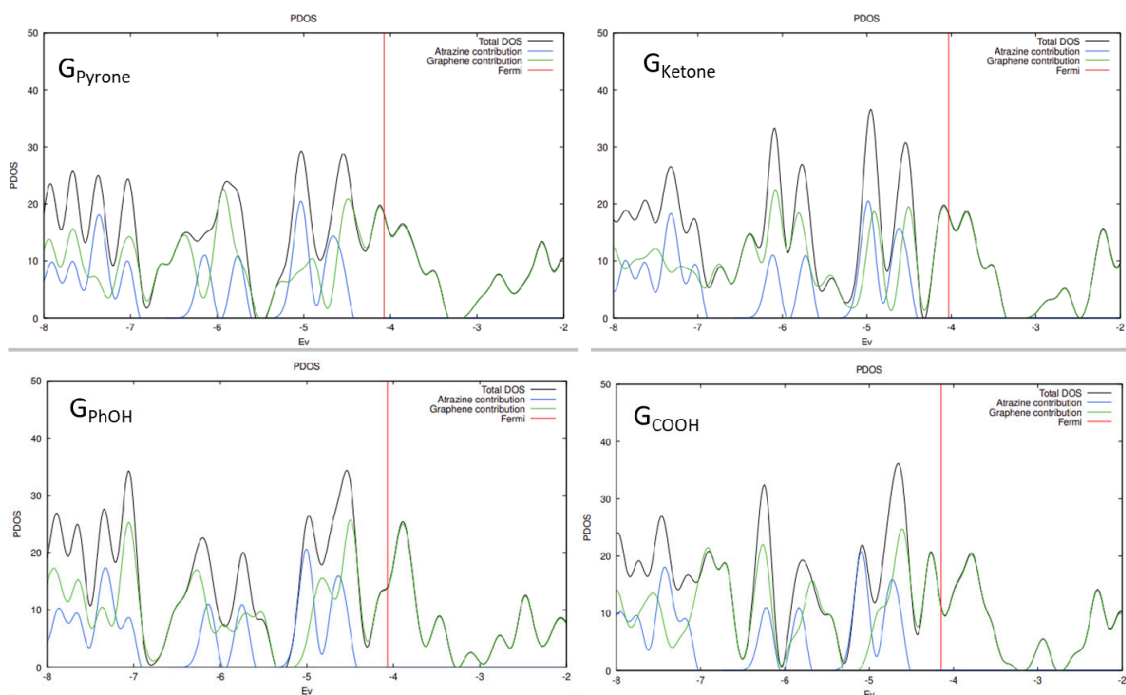

**Figure S5.** DOS (black line) and projected DOS on the oxygen-containing graphene (green line) and atrazine (blue line) with PBE exchange–correlation functional.

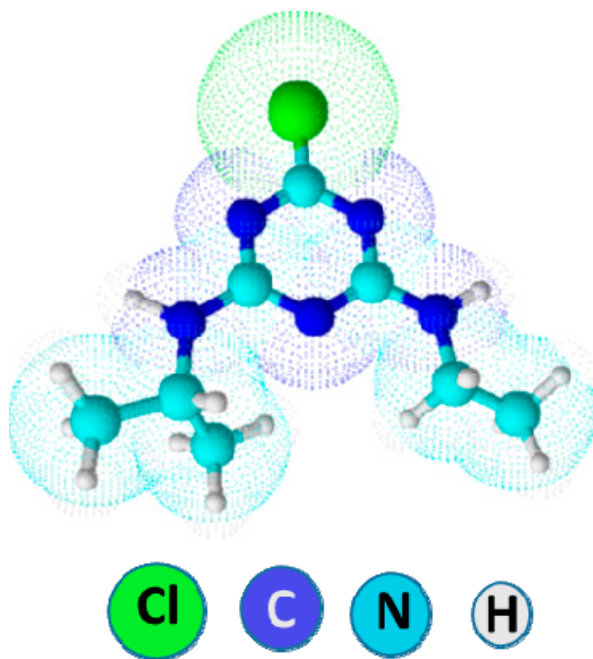

**Figure S6.** Molecular structure of atrazine ( $\text{C}_8\text{H}_{14}\text{ClN}_5$ ).
